# Supplementary material for: Comparative Efficacy and Acceptability of Antidepressants in Parkinson's Disease: A Network Meta-Analysis
Source: PubMed Central journal article supplement (PMC3788746; doi:10.1371/journal.pone.0076651), 2013-10-02
Supplement: pone.0076651.s001.pdf [file pone.0076651.s001.pdf]

| Study                   | Experimental group                         | Comparator                                              | N (% male) | Mean age (age range or SD)  | Duration of study | Mean duration of PD (SD)    | Hoehn and Yahr stage mean (SD) | Depression Scale  | Response rate                                             | Dropout rate                                             |
|-------------------------|--------------------------------------------|---------------------------------------------------------|------------|-----------------------------|-------------------|-----------------------------|--------------------------------|-------------------|-----------------------------------------------------------|----------------------------------------------------------|
| Richard, et al. (2012)  | paroxetine (10-40 mg/day)                  | 1. placebo<br>2. venlafaxine (75 mg/day)                | NA         | NA                          | 12 weeks          | NA                          | NA                             | HDRS              | Placebo: 15/34<br>Paroxetine: 23/34<br>Venlafaxine: 16/30 | Placebo: 6/39<br>Paroxetine: 4/34<br>Venlafaxine: 8/42   |
| Barone et al. (2010)    | pramipexole (mean dose: 2.18±0.83mg/day)   | placebo                                                 | 140(47.3%) | E:67.4(9.0)<br>C:66.6(9.9)  | 12weeks           | E:4.0(4.5)<br>C:4.0(3.9)    | I-III(range)                   | BDI               | Placebo: 27/147<br>Pramipexole: 38/139                    | Placebo: 19/152<br>Pramipexole:20/144                    |
| Weintraub et al. (2010) | Atomoxetine (mean dose: 40mg/day)          | placebo                                                 | 36 (66.6%) | 64.3(10.5)                  | 8weeks            | E:7.9(6.6)<br>C:5.7(5.6)    | NA                             | IDS-C             | Placebo: 2/21<br>Atomoxetine: 5/22                        | Placebo: 6/27<br>Atomoxetine: 6/28                       |
| Menza et al. (2009)     | paroxetine CR (mean dose: 28.4 mg/day)     | 1. placebo<br>2. nortriptyline (mean dose: 48.5 mg/day) | 52 (52%)   | 62.2 (8.7)                  | 8 weeks           | 6.6 years                   | 2.2                            | HDRS              | Placebo: 4/17<br>Nortriptyline:9/17<br>Paroxetine:2/18    | Placebo: 6/17<br>Nortriptyline: 5/17<br>Paroxetine: 7/18 |
| Devos et al. (2008)     | citalopram(20mg/day)                       | 1. placebo<br>2. desipramine (75 mg/day)                | 48 (NA)    | 61.8 (56-68)                | 4 weeks           | 8 years                     | NA                             | MADRS             | Placebo: 4/14<br>Desipramine: 11/15<br>Citalopram: 8/13   | Placebo: 0/16<br>Desipramine: 1/17<br>Citalopram: 2/15   |
| Antonini et al. (2006)  | sertraline (50 mg/ day)                    | amitriptyline (25 mg/day)                               | 31 (45%)   | E:71.8(6.5)<br>C:68.5 (6.6) | 12 weeks          | E: 7.5 years<br>C: 7.3years | E: 2.0<br>C: 2.4               | HDRS              | Sertraline: 10/12<br>Amitriptyline:8/11                   | Sertraline: 4/16<br>Amitriptyline:4/15                   |
| Barone et al. (2006)    | pramipexole (mean dose: 3.24 ± 1.3 mg/day) | sertraline (mean dose: 48.1 ± 5.9 mg/day)               | 67 (52%)   | E:64.8(8.3)<br>C:68.1 (6.5) | 12 weeks          | NA                          | E:2.5(median)<br>C:2 (median)  | HDRS              | Pramipexole: 23/33<br>Sertraline: 16/33                   | Pramipexole: 1/33<br>Sertraline: 7/34                    |
| Rektorova et al. (2003) | pramipexole(1.5-4.5mg/day)                 | pergolide(1.5-4.5mg/day)                                | 25 (61%)   | E:59.7(7.7)<br>C:63.5(7.5)  | 8months           | NA                          | E:2.7(0.8)<br>C:3.0(1.0)       | Zung SRS<br>MADRS | Pramipexole: 8/18<br>Pergolide: 3/16                      | Pramipexole: 3/22<br>Pergolide: 2/19                     |
| Leentjens et al. (2003) | sertraline (25-100 mg/day)                 | placebo                                                 | 12 (67%)   | 67 (7.8)                    | 10 weeks          | NA                          | I-IV (range)                   | MADRS             | Placebo: 4/6<br>Sertraline: 3/6                           | Placebo: 0/6<br>Sertraline: 0/6                          |

| Study                 | Experimental group                 | Comparator                          | N (% male) | Mean age (age range or SD) | Duration of study | Mean duration of PD (SD) | Hoehn and Yahr stage mean (SD) | Depression Scale | Response rate                              | Dropout rate                              |
|-----------------------|------------------------------------|-------------------------------------|------------|----------------------------|-------------------|--------------------------|--------------------------------|------------------|--------------------------------------------|-------------------------------------------|
| Wermuth et al. (1998) | citalopram (10-20mg/day)           | placebo                             | 37 (43%)   | 64 (44-79)                 | 6 weeks           | NA                       | I-III (range)                  | HDRS             | Placebo: 3/19<br>Citalopram: 2/18          | Placebo: 2/19<br>Citalopram: 5/18         |
| Rabey et al. (1996)   | fluvoxamine (mean dose: 78 mg/day) | Amitriptyline (mean dose: 69mg/day) | 47 (NA)    | 75 (NA)                    | 16 weeks          | 7 years                  | NA                             | HDRS             | Fluvoxamine: 12/20<br>Amitriptyline: 15/27 | Fluvoxamine: 8/20<br>Amitriptyline: 12/27 |

PD: Parkinson's disease; MADRS: Montgomery-Asberg Depression Rating Scale; HDRS: Hamilton Depression Rating Scale; BDI: Beck Depression Inventory E: Experimental group; C: comparator-group; SD: standard deviation; NA: not available
